# Supplementary material for: Coupling chemosensory array formation and localization
Source: eLife journal article supplement (doi:10.7554/elife.31058), 2017-10-23
Supplement: supp [file elife_poa_e31058_Figure_2_figure_supplement_3.pdf › elife_poa_e31058_Figure_2_figure_supplement_3.pdf]

Figure 2 - Figure Supplement 3

Alignment of *Thermotoga maritima* MCP TM1143 domain responsible for interaction with CheW and CheA-P5 and *V. cholerae* MCPs

---

|         |                                   |
|---------|-----------------------------------|
| TM1143  | Q T N L L A L N A A I E A A R A G |
| VC1403  | Q I A M L A V N G A V E A A R A G |
| VCA1088 | Q T N L L A L N A A I E A A R A G |
| VCA0031 | Q T N L L A L N A A I E A A R A G |
| VCA0658 | Q T N L L A L N A A I E A A R A G |
| VC1298  | Q T N L L A L N A A I E A A R A G |
| VC1868  | Q T N L L A L N A A I E A A R A G |
| VC1967  | Q T N L L A L N A A I E A A R A G |
| VC0098  | Q T N I L A L N A A V E A A R A G |
| VCA1092 | Q T N L L A L N A A V E A A R A G |
| VC1394  | E T N L L A L N A A I E A A R S G |
| VCA0773 | Q T N L L A L N A A I E A A R A G |
| VC1406  | Q T N L L A L N A A I E A A R A G |
| VCA0663 | Q T N L L A L N A A I E A A R A G |
| VCA0864 | Q T N L L A L N A A I E A A R A G |
| VCA0906 | Q T N L L A L N A A I E A A R A G |
| VCA0988 | Q T N L L A L N A A I E A A R A G |
| VC1859  | Q T N L L A L N A A I E A A R A G |
| VC0825  | Q T N L L A L N A A I E A A R A G |
| VC0282  | Q T N L L A L N A A I E A A R A G |
| VC1405  | Q T N L L A L N A A I E A A R A G |
| VCA1056 | Q T N L L A L N A A I E A A R A G |
| VC0840  | Q T N L L A L N A A I E A A R A G |
| VC0216  | Q T N L L A L N A A I E A A R A G |
| VC1413  | Q T N L L A L N A A I E A A R A G |
| VCA0268 | Q T N L L A L N A A I E A A R A G |
| VC1643  | Q T N L L A L N A A I E A A R A G |
| VCA1034 | Q T N L L A L N A A I E A A R A G |
| VC1313  | Q T N L L A L N A A I E A A R A G |
| VC1898  | Q T N L L A L N A A I E A A R A G |
| VCA0068 | Q T N L L A L N A A I E A A R A G |
| VCA0974 | Q T N L L A L N A A I E A A R A G |
| VCA0220 | Q T N L L A L N A A I E A A R A G |
| VCA0176 | Q T N L L A L N A A I E A A R A G |
| VC0512  | Q T N L L A L N A A I E A A R A G |
| VC0449  | Q T N L L A L N A A I E A A R A G |
| VC2439  | Q T N L L A L N A A I E A A R A G |
| VCA0008 | Q T N L L A L N A A I E A A R A G |
| VC0514  | Q T N L L A L N A A I E A A R A G |
| VC2161  | Q T N L L A L N A A I E A A R A G |
| VCA0923 | Q T N L L A L N A A I E A A R A G |
| VC1248  | Q T N L L A L N A A I E A A R A G |
| VC1289  | Q T N L L A L N A A I E A A R A G |
| VCA1069 | Q T N L L A L N A A I E A A R A G |
