# Supplementary material for: Coupling chemosensory array formation and localization
Source: eLife journal article supplement (doi:10.7554/elife.31058), 2017-10-23
Supplement: supp [file elife_poa_e31058_Figure_3_figure_supplement_1.pdf › elife_poa_e31058_Figure_3_figure_supplement_1.pdf]

Alignment of *Thermotoga maritima* MSB8 CheW and the SH3-like AIF domain of ParP

Tm CheW MKTLADALKEFEVLSFEIDEQALAFDNDNEMVIEKSDITVPVKSRHFVEGVINL  
 ParP .....QVLYFDVNGVTFAPVLDLELGGTHRM TTLNHLIGRPAWYLG LQTN  
 Tm CheW RGR IIPVVNLAK ILGISFDEQKMKSI IIVARTK DVEVGF LVD RVLGVLRITEN  
 ParP RDSQLD VVD TAKVWMAEKL RDESYKQAYQY IVM LGESAWGLASTQLMGTELLSTE  
 Tm CheW QLDLTINVSDKFGKKSLKGLVKTDGRLI IYLDIDKIEEITVKEGV  
 ParP KVRW...REQVGKRPWLAGMVKE--KMCALIHVQALIAM.....
