# Supplementary figures and images for: Coupling chemosensory array formation and localization
Source: eLife journal article supplement (doi:10.7554/elife.31058), 2017-10-23

Figure 1 - Figure Supplement 1

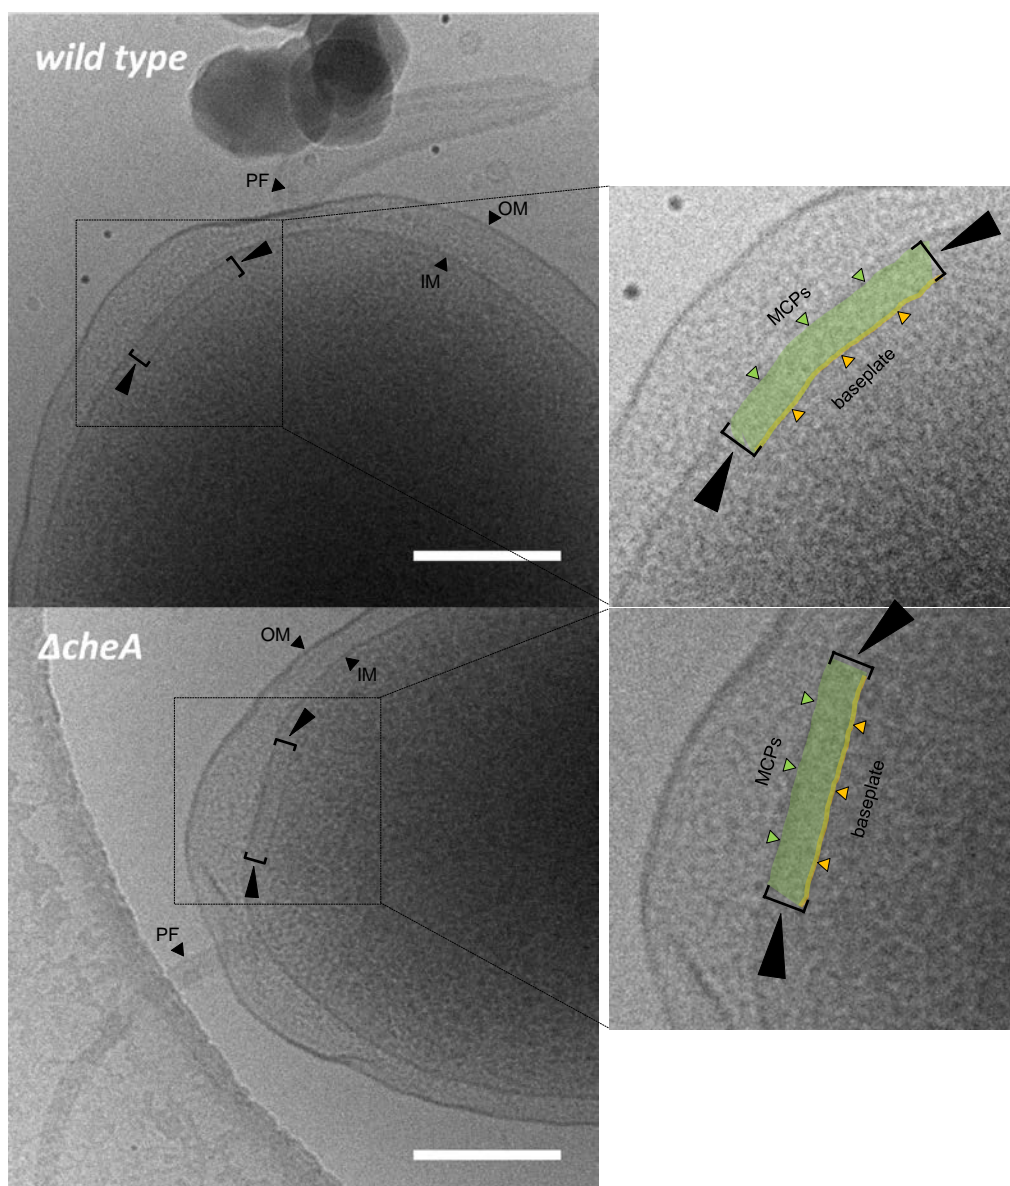

Supplement: supp [file elife_poa_e31058_Figure_1_figure_supplement_1.pdf › elife_poa_e31058_Figure_1_figure_supplement_1.pdf]

**Figure 2 - Figure Supplement 1**

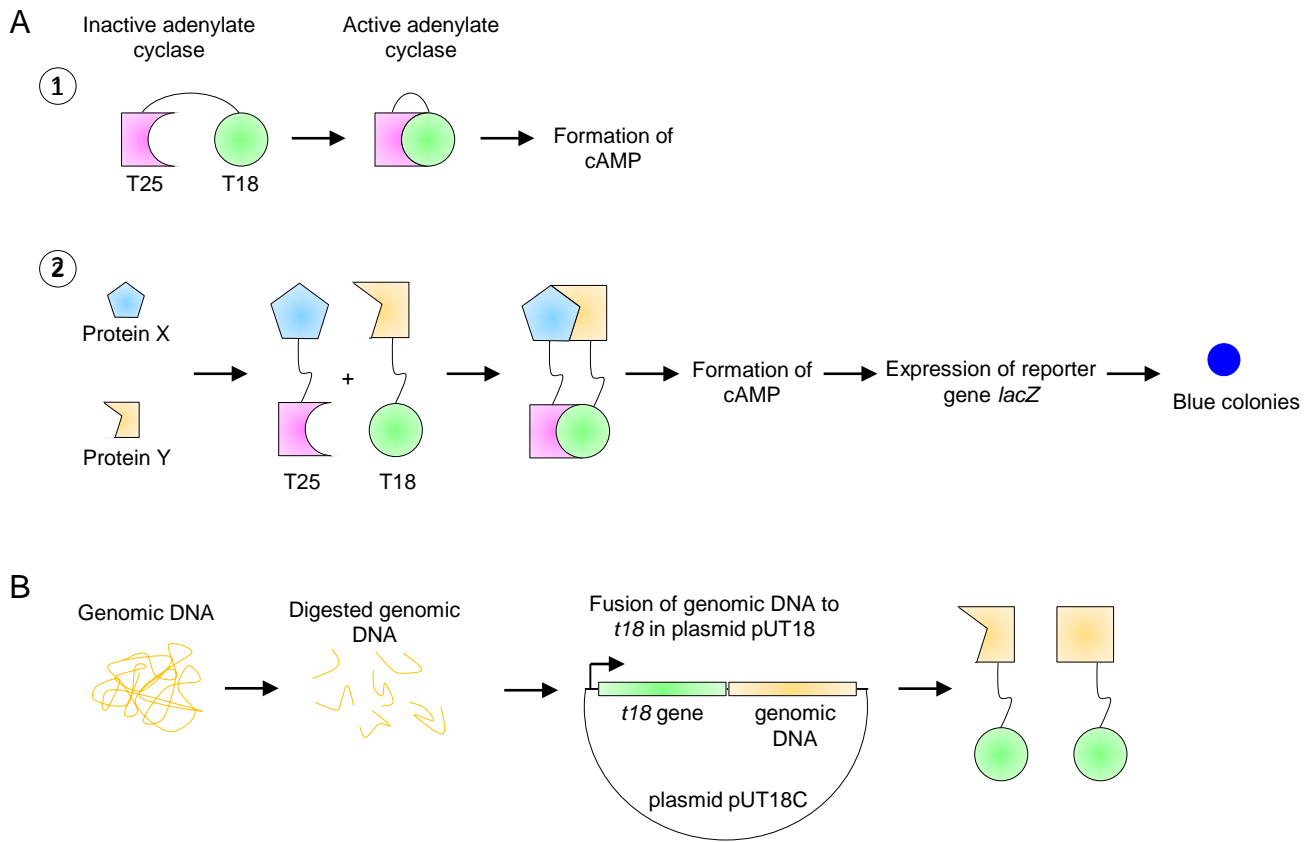

Supplement: supp [file elife_poa_e31058_Figure_2_figure_supplement_1.pdf › elife_poa_e31058_Figure_2_figure_supplement_1.pdf]

Figure 2 - Figure Supplement 2

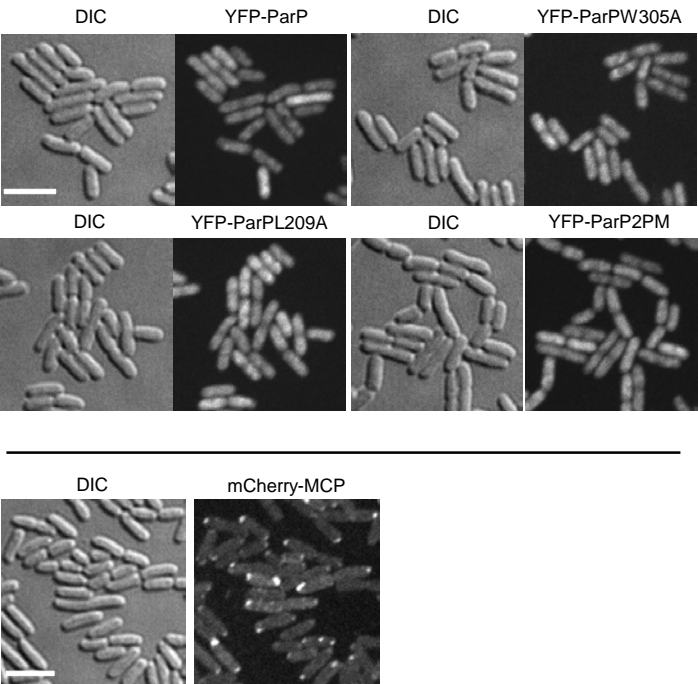

Supplement: supp [file elife_poa_e31058_Figure_2_figure_supplement_2.pdf › elife_poa_e31058_Figure_2_figure_supplement_2.pdf]

Figure 3 - Figure Supplement 2

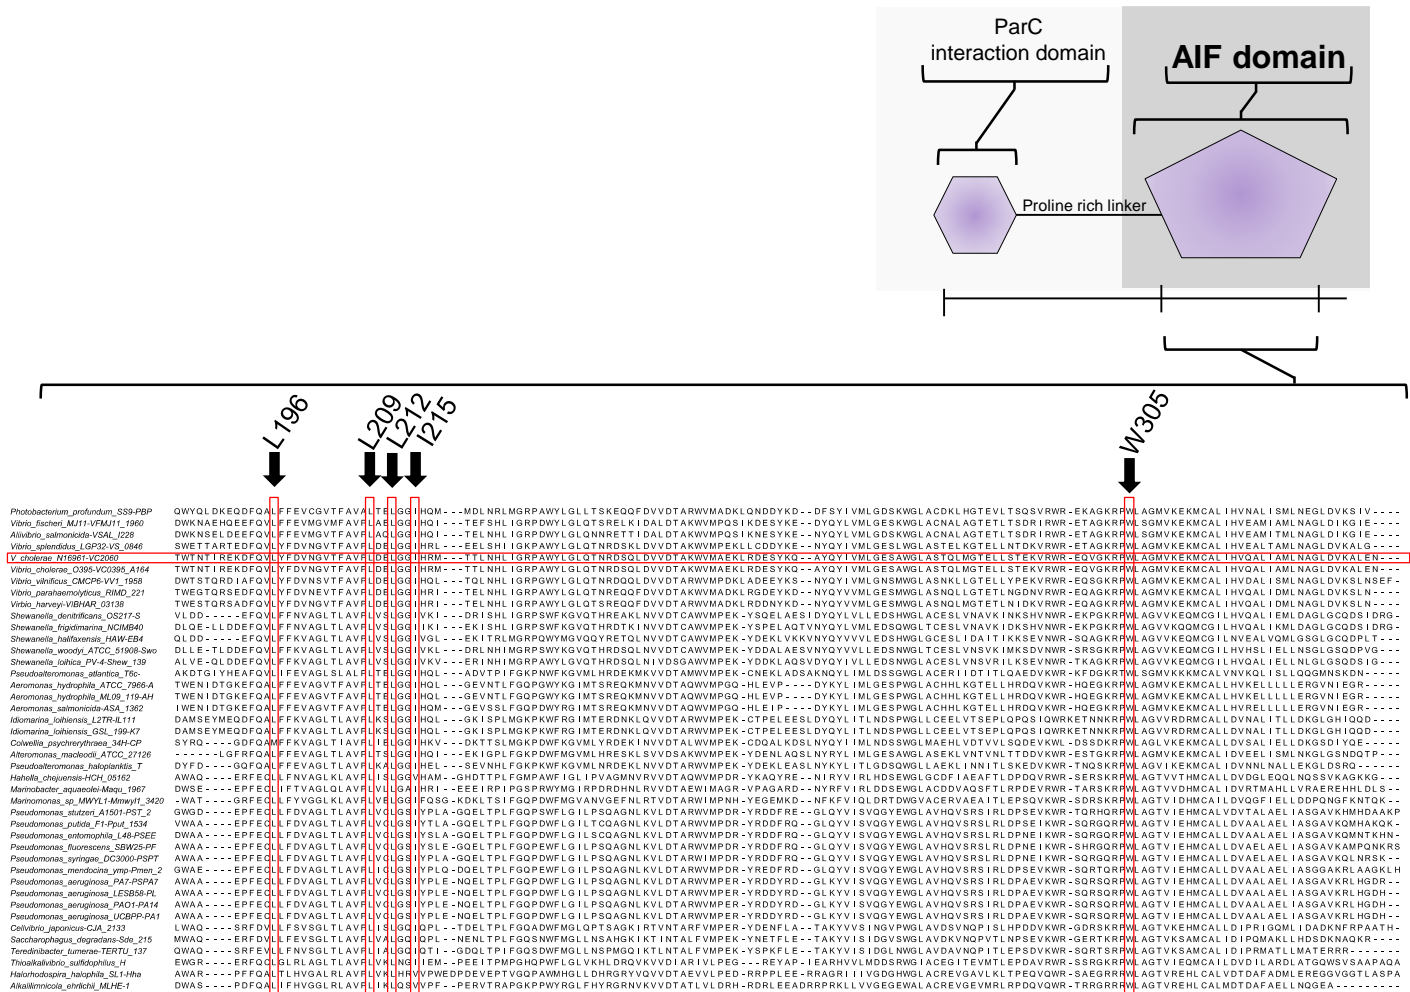

Supplement: supp [file elife_poa_e31058_Figure_3_figure_supplement_2.pdf › elife_poa_e31058_Figure_3_figure_supplement_2.pdf]

Figure 5 - Figure Supplement 1

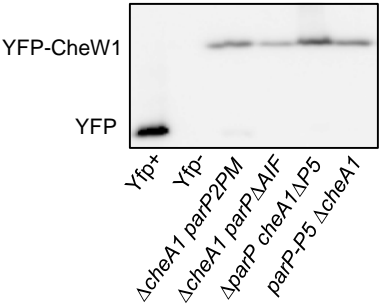

Supplement: supp [file elife_poa_e31058_Figure_5_figure_supplement_1.pdf › elife_poa_e31058_Figure_5_figure_supplement_1.pdf]

Figure 5 - Figure Supplement 2

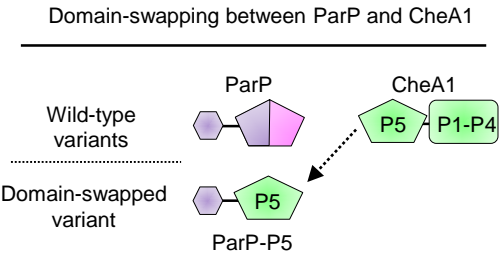

Supplement: supp [file elife_poa_e31058_Figure_5_figure_supplement_2.pdf › elife_poa_e31058_Figure_5_figure_supplement_2.pdf]

Figure 9 - Figure Supplement 1

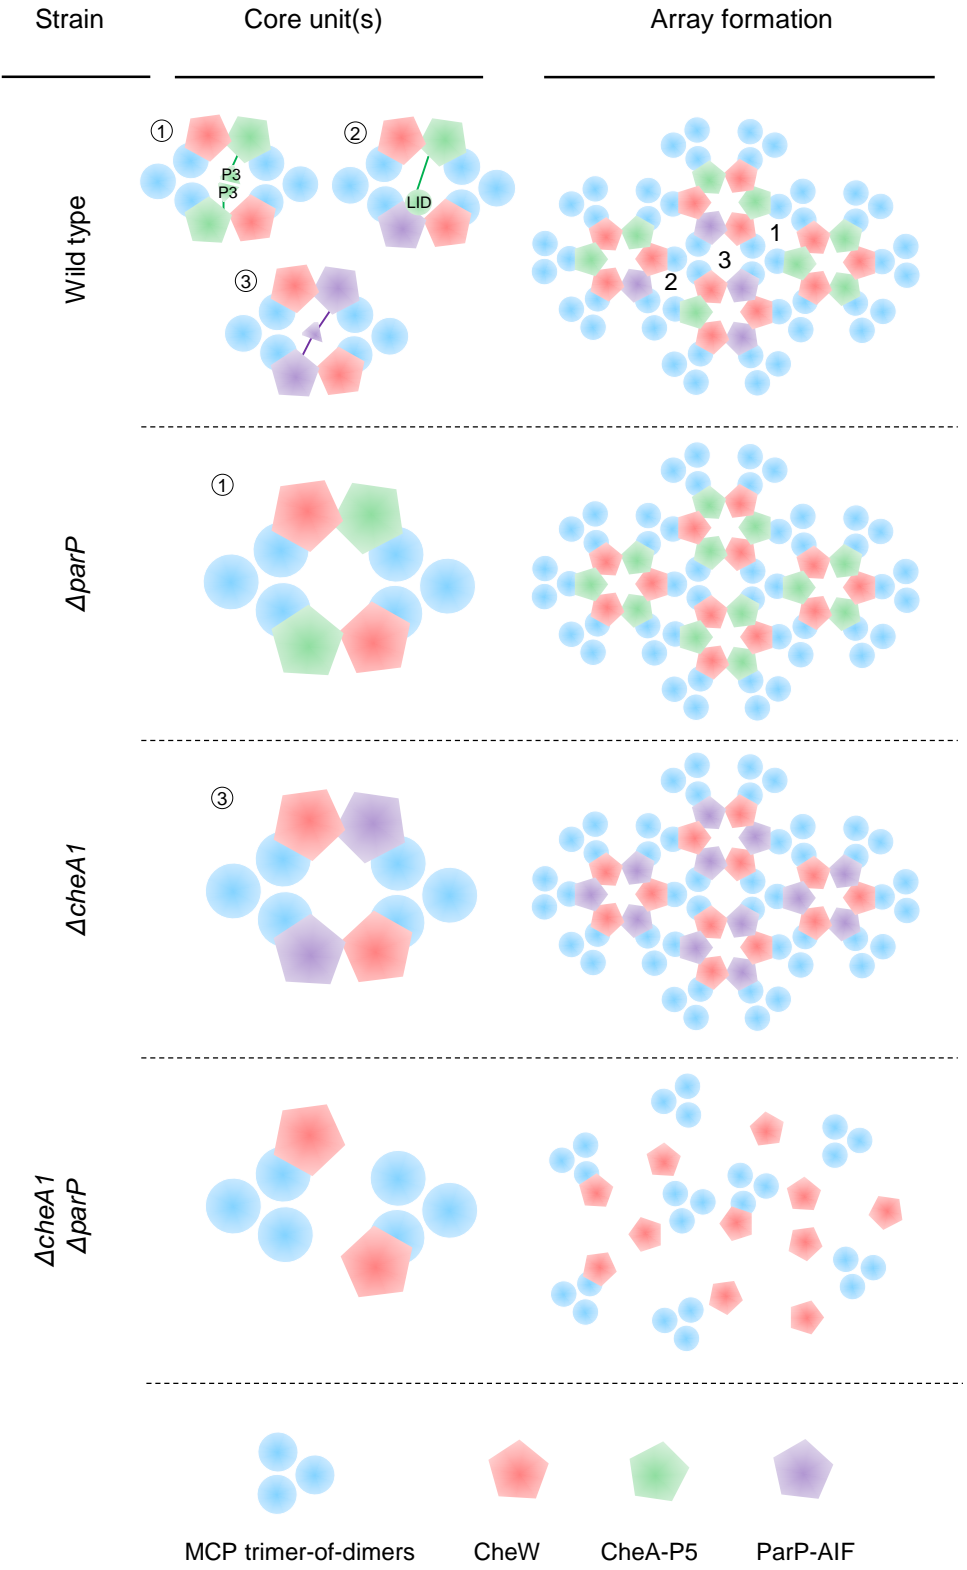

Supplement: supp [file elife_poa_e31058_Figure_9_figure_supplement_1.pdf › elife_poa_e31058_Figure_9_figure_supplement_1.pdf]
